# Supplementary material
Source: PubMed Central journal article supplement (PMC8424754)

# Supplemental Figure 1. Protein expression in *Scrib* mutants.

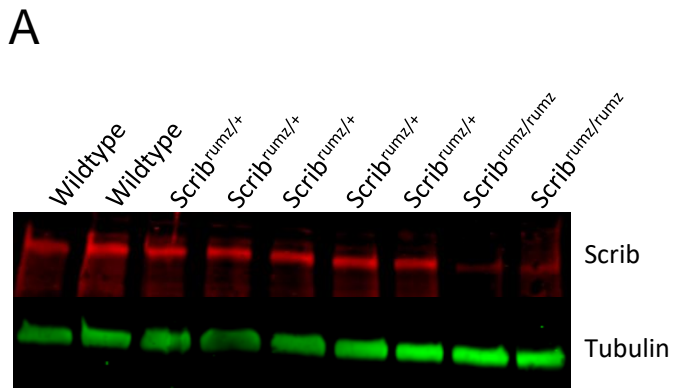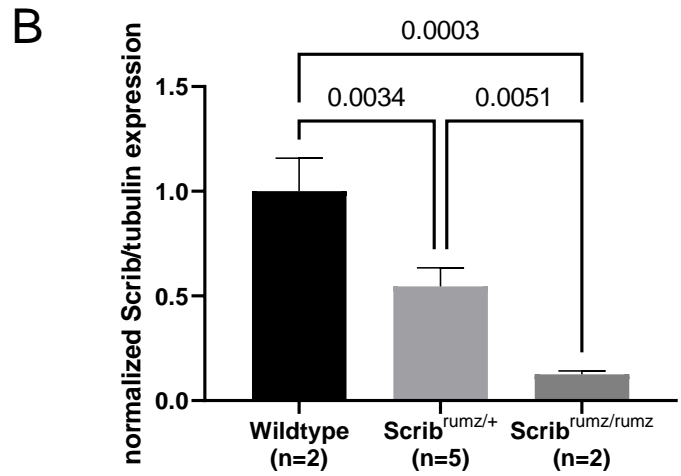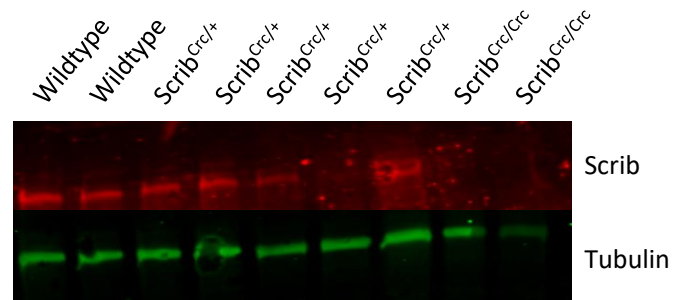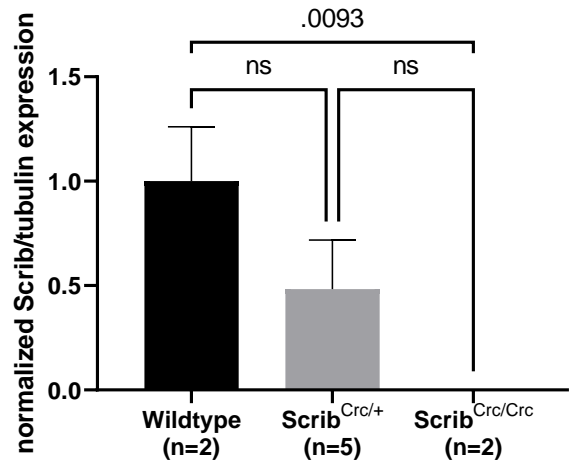

Supplemental Figure 2. Overall tissue shape changes in the neural tube are due to cell shape changes and not cell number.

A

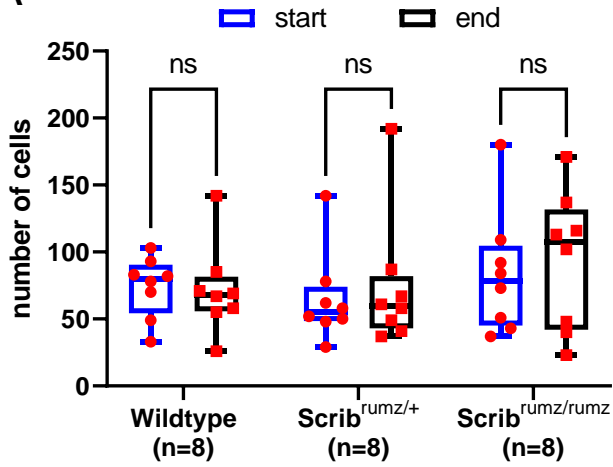

B

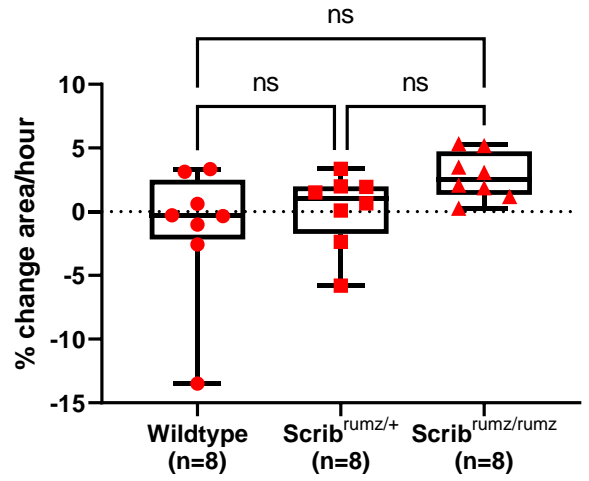

Supplement: NIHMS1729825-supplement-Supplementary_figures.pdf [file NIHMS1729825-supplement-Supplementary_figures.pdf]
